# Supplementary material for: Electroanalytical determination of the linuron herbicide using a cathodically pretreated boron-doped diamond electrode: comparison with a boron-doped diamond electrode modified with platinum nanoparticles
Source: Royal Society of Chemistry journal article supplement (doi:10.1039/c4ay02182g), 2014-11-24
Supplement: c4ay02182g1.pdf [file c4ay02182g1.pdf]

**Electronic Supplementary Information for the Paper**

**Electroanalytical determination of the linuron herbicide using a  
cathodically pretreated boron-doped diamond electrode: comparison with  
a boron-doped diamond electrode modified with platinum nanoparticles**

Luiz C. S. Figueiredo-Filho<sup>a\*</sup>, Elen R. Sartori<sup>a,b</sup>, and O. Fatibello-Filho<sup>a</sup>

<sup>a</sup>Departamento de Química, Universidade Federal de São Carlos, C.P. 676, 13560-970, São Carlos – SP, Brazil

<sup>b</sup>Departamento de Química, Universidade Estadual de Londrina, C.P. 10.011, 86057-970, Londrina – PR, Brazil

\* Corresponding author.

Tel.: +55 16 33518055

E-mail address: [figueiredo.lcs@gmail.com](mailto:figueiredo.lcs@gmail.com) (L.C.S. Figueiredo-Filho)

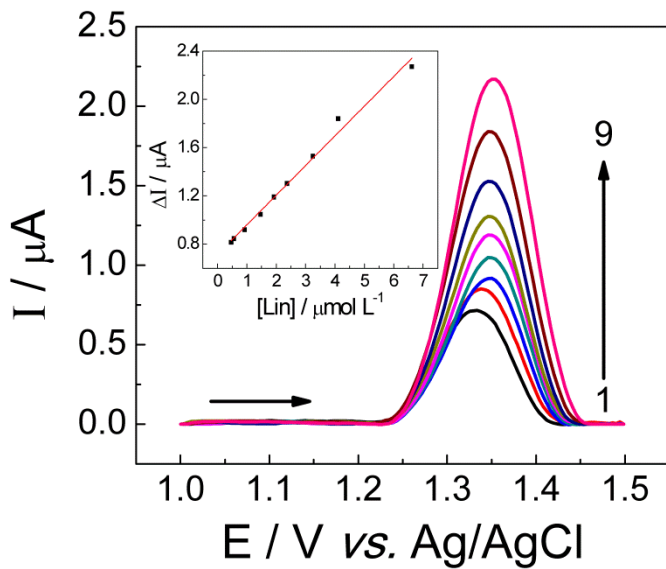

Figure ESI1 – Square-wave voltammograms obtained using the cathodically pretreated BDDE for various concentration of linuron (1–9):  $0.61 - 26.0 \mu\text{mol L}^{-1}$  in BR buffer solution (pH 2.0). Insert: Analytical curve for the linuron oxidation process.

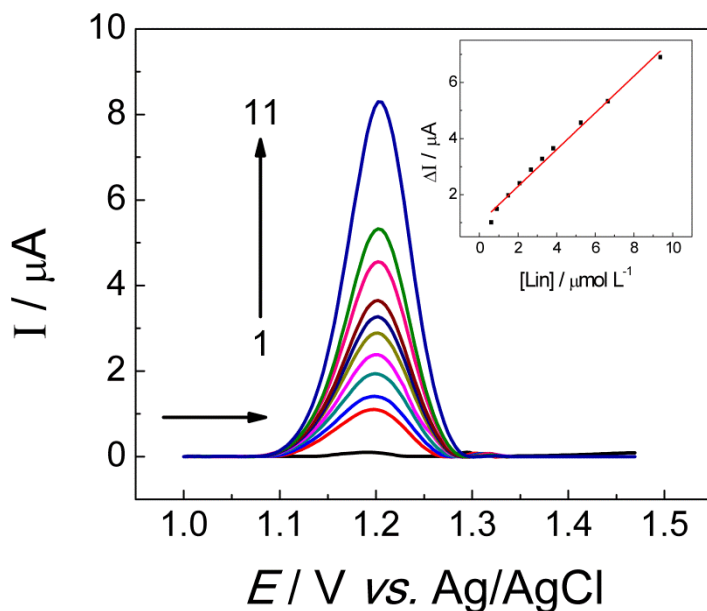

Figure ESI2 – Pulse-differential voltammograms obtained using the cathodically pretreated BDDE modified with platinum nanoparticles for various concentration of linuron (1–11):  $0.61 - 6.6 \mu\text{mol L}^{-1}$  in BR buffer solution (pH 2.0). Insert: Analytical curve for the linuron oxidation process.

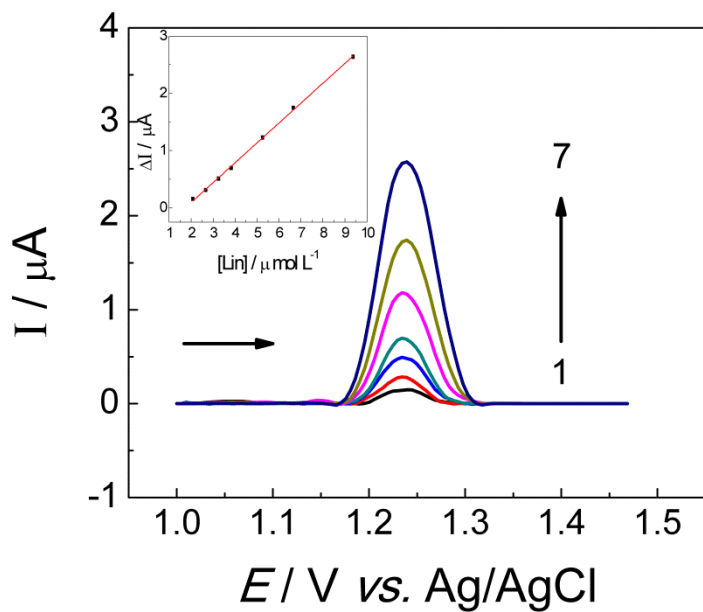

Figure ESI3 – Square-wave voltammograms obtained using the cathodically pretreated BDDE modified with platinum nanoparticles for various concentration of linuron (1–7): 2.1 – 14.9  $\mu\text{mol L}^{-1}$  in BR buffer solution (pH 2.0). Insert: Analytical curve for the linuron oxidation process.
